# Supplementary material
Source: Springer Nature journal article supplement (https://www.springermedizin.de/resource/supplementary/12967_2011_790_MOESM6_ESM.pdf/9577064)

**A****Anti-A $\beta$  antibody responses**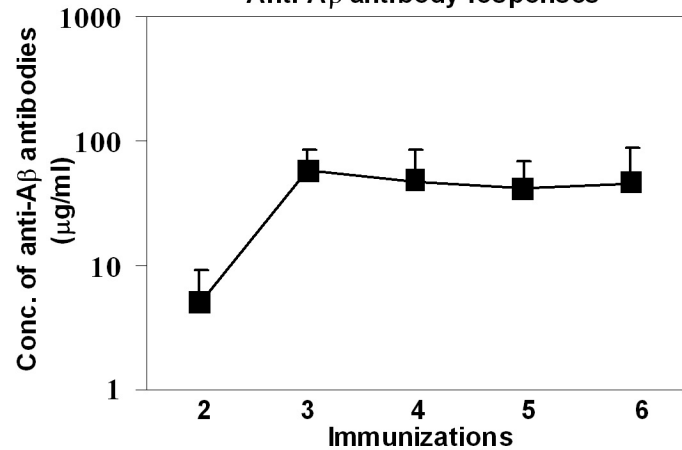**B****Binding to WSN-WT**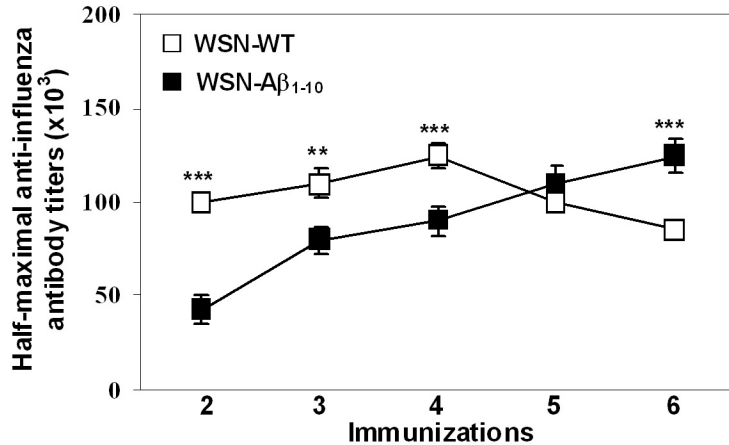

Supplement: MOESM6 [file 9577064]
